# Supplementary material for: Widespread mRNA Association with Cytoskeletal Motor Proteins and Identification and Dynamics of Myosin-Associated mRNAs in S. cerevisiae
Source: PLoS One. 2012 Feb 16;7(2):e31912. doi: 10.1371/journal.pone.0031912 (PMC3281097; doi:10.1371/journal.pone.0031912)
Supplement: Table S1 — S. cerevisiae strains used in this study. Yeast strains acquired or constructed for this study. Strains JCY18 [129] and GFP strains, including the wildtype parent JCY93 [45], have previously been published. (XLS) [file pone.0031912.s009.xls]

## Sheet: Sheet1
Strain	Gene(s) of Interest	Genotype	Plasmid
JCY18 (aka PSY2156)	wild-type	MATa ade2-1 trp1-1 can1-100 leu2-3,112 his3-11,15 ura3 GAL+ PSI+
JCY19	myo4:9Myc	MATa ade2-1 trp1-1 can1-100 leu2-3,112 his3-11,15 ura3 GAL+ PSI+ myo4:9Myc:klTRP1
JCY31	smy1:9Myc	MATa ade2-1 trp1-1 can1-100 leu2-3,112 his3-11,15 ura3 GAL+ PSI+ smy1:9Myc:klTRP1
JCY33	myo4:GFP	MATa his3∆1 leu2∆0 met15∆0 ura3∆0 myo4:GFP:HIS3MX6
JCY34	smy1:GFP	MATa his3∆1 leu2∆0 met15∆0 ura3∆0 smy1:GFP:HIS3MX6
JCY36	kip2:9Myc	MATa ade2-1 trp1-1 can1-100 leu2-3,112 his3-11,15 ura3 GAL+ PSI+ kip2:9Myc:klTRP1
JCY37	dyn1:9Myc	MATa ade2-1 trp1-1 can1-100 leu2-3,112 his3-11,15 ura3 GAL+ PSI+ dyn1:9Myc:klTRP1
JCY38	myo3:9Myc	MATa ade2-1 trp1-1 can1-100 leu2-3,112 his3-11,15 ura3 GAL+ PSI+ myo3:9Myc:klTRP1
JCY39	myo5:9Myc	MATa ade2-1 trp1-1 can1-100 leu2-3,112 his3-11,15 ura3 GAL+ PSI+ myo5:9Myc:klTRP1
JCY41	kip3:GFP	MATa his3∆1 leu2∆0 met15∆0 ura3∆0 kip3:GFP:HIS3MX6
JCY42	myo2:GFP	MATa his3∆1 leu2∆0 met15∆0 ura3∆0 myo2:GFP:HIS3MX6
JCY43	vrp1:GFP	MATa his3∆1 leu2∆0 met15∆0 ura3∆0 vrp1:GFP:HIS3MX6
JCY44	las17:GFP	MATa his3∆1 leu2∆0 met15∆0 ura3∆0 las17:GFP:HIS3MX6
JCY45	myo5:GFP	MATa his3∆1 leu2∆0 met15∆0 ura3∆0 myo5:GFP:HIS3MX6
JCY46	kar3:GFP	MATa his3∆1 leu2∆0 met15∆0 ura3∆0 kar3:GFP:HIS3MX6
JCY49	myo1:GFP	MATa his3∆1 leu2∆0 met15∆0 ura3∆0 myo1:GFP:HIS3MX6
JCY50	myo3:GFP	MATa his3∆1 leu2∆0 met15∆0 ura3∆0 myo3:GFP:HIS3MX6
JCY51	kip2:GFP	MATa his3∆1 leu2∆0 met15∆0 ura3∆0 kip2:GFP:HIS3MX6
JCY57	kip1:GFP	MATa his3∆1 leu2∆0 met15∆0 ura3∆0 kip1:GFP:HIS3MX6
JCY59	dyn1:GFP	MATa his3∆1 leu2∆0 met15∆0 ura3∆0 dyn1:GFP:HIS3MX6
JCY60	kar9:GFP	MATa his3∆1 leu2∆0 met15∆0 ura3∆0 kar9:GFP:HIS3MX6
JCY93 (aka EY0987)	wild-type	MATα his3∆1 leu2∆0 lys2∆0 ura3∆0
JCY107	ash1:MS2	MATa ade2-1 trp1-1 can1-100 leu2-3,112 his3-11,15 ura3 GAL+ PSI+ ash1:loxP:MS2Lx12	pMS2-CP-GFPx3 <CEN pMET25:MS2CPGFPx3 HIS3>
JCY115	vrp1:MS2	MATa ade2-1 trp1-1 can1-100 leu2-3,112 his3-11,15 ura3 GAL+ PSI+ vrp1:loxP:MS2Lx12	pMS2-CP-GFPx3 <CEN pMET25:MS2CPGFPx3 HIS3>
JCY126	vrp1:MS2	MAT a/α ade2-1/ADE2 trp1-1/TRP1 can1-100/CAN1 leu2-3,112/leu2∆0 his3-11,15/his3∆1 ura3/ura3∆0 LYS2/lys2∆0 vrp1:loxP:MS2Lx12/VRP1	pMS2-CP-GFPx3 <CEN pMET25:MS2CPGFPx3 HIS3>
JCY178	las17:MS2	MATa ade2-1 trp1-1 can1-100 leu2-3,112 his3-11,15 ura3 GAL+ PSI+ las17:loxP:MS2Lx12	pMS2-CP-GFPx3 <CEN pMET25:MS2CPGFPx3 HIS3>
JCY179	myo3∆::KanMX4	MATa his3∆1 leu2∆0 met15∆0 ura3∆0 myo3::KanMX4
JCY230	sac6:mCherry	MATα his3∆1 leu2∆0 lys2∆0 ura3∆0 sac6:mCherry:KanMX4
JCY233	bbc1:MS2	MATa ade2-1 trp1-1 can1-100 leu2-3,112 his3-11,15 ura3 GAL+ PSI+ bbc1:loxP:MS2Lx12	pMS2-CP-GFPx3 <CEN pMET25:MS2CPGFPx3 HIS3>
JCY251	bbc1:MS2 sac6:mCherry	MATa/α his3-11/his3∆1 leu2-3,112/leu2∆0 LYS2/lys2∆0 ura3/ura3∆0 can1-100/CAN1 trp1-1/TRP1 ade2-1/ADE2 bbc1:loxP:MS2Lx12/BBC1 SAC6/sac6:mCherry:KanMX4	pMS2-CP-GFPx3 <CEN pMET25:MS2CPGFPx3 HIS3>
JCY255	ash1:MS2 sac6:mCherry	MATa/α his3-11/his3∆1 leu2-3,112/leu2∆0 LYS2/lys2∆0 ura3/ura3∆0 can1-100/CAN1 trp1-1/TRP1 ade2-1/ADE2 ash1:loxP:MS2Lx12/ASH1 SAC6/sac6:mCherry:KanMX4	pMS2-CP-GFPx3 <CEN pMET25:MS2CPGFPx3 HIS3>
JCY263	vrp1:MS2 sac6:mCherry	MATa/α his3-11/his3∆1 leu2-3,112/leu2∆0 LYS2/lys2∆0 ura3/ura3∆0 can1-100/CAN1 trp1-1/TRP1 ade2-1/ADE2 vrp1:loxP:MS2Lx12/VRP1 SAC6/sac6:mCherry:KanMX4	pMS2-CP-GFPx3 <CEN pMET25:MS2CPGFPx3 HIS3>
JCY267	las17:MS2 sac6:mCherry	MATa/α his3-11/his3∆1 leu2-3,112/leu2∆0 LYS2/lys2∆0 ura3/ura3∆0 can1-100/CAN1 trp1-1/TRP1 ade2-1/ADE2 las17:loxP:MS2Lx12/LAS17 SAC6/sac6:mCherry:KanMX4	pMS2-CP-GFPx3 <CEN pMET25:MS2CPGFPx3 HIS3>
JCY304	myo2:9Myc	MATa ade2-1 trp1-1 can1-100 leu2-3,112 his3-11,15 ura3 GAL+ PSI+ myo2:9Myc:klTRP1
JCY324	arg3:MS2	MATa ade2-1 trp1-1 can1-100 leu2-3,112 his3-11,15 ura3 GAL+ PSI+ arg3:loxP:MS2Lx12	pMS2-CP-GFPx3 <CEN pMET25:MS2CPGFPx3 HIS3>
JCY335	arg3:MS2 sac6:mCherry	MATa/α his3-11/his3∆1 leu2-3,112/leu2∆0 LYS2/lys2∆0 ura3/ura3∆0 can1-100/CAN1 trp1-1/TRP1 ade2-1/ADE2 arg3:loxP:MS2Lx12/ARG3 SAC6/sac6:mCherry:KanMX4	pMS2-CP-GFPx3 <CEN pMET25:MS2CPGFPx3 HIS3>
JCY392	sac6:mCherry myo3∆::hph	MATα his3∆1 leu2∆0 lys2∆0 ura3∆0 sac6:mCherry:KanMX4 myo3∆::hph
JCY364	wild-type with pCP-MS2-GFPx3 plasmid	MATa ade2-1 trp1-1 can1-100 leu2-3,112 his3-11,15 ura3 GAL+ PSI+	pMS2-CP-GFPx3 <CEN pMET25:MS2CPGFPx3 HIS3>
JCY395	las17:MS2 myo3∆::KanMX4	MATa ade2-1 trp1-1 can1-100 leu2-3,112 his3-11,15 ura3 GAL+ PSI+ las17:loxP:MS2Lx12 myo3∆::KanMX4	pMS2-CP-GFPx3 <CEN pMET25:MS2CPGFPx3 HIS3>
JCY396	bbc1:MS2 myo3∆::KanMX4	MATa ade2-1 trp1-1 can1-100 leu2-3,112 his3-11,15 ura3 GAL+ PSI+ bbc1:loxP:MS2Lx12 myo3∆::KanMX4	pMS2-CP-GFPx3 <CEN pMET25:MS2CPGFPx3 HIS3>
JCY405	las17:MS2 sac6:mCherry myo3∆::hph myo3∆::KanMX4	MATa/α ade2-1/ADE2 trp1-1/TRP1 can1-100/CAN1 leu2-3,112/leu2∆0 his3-11,15/his3∆1 ura3/ura3∆0 LYS2/lys2∆0 las17:loxP:MS2Lx12/LAS17 myo3∆::KanMX4/myo3∆::hph SAC6/sac6:mCherry:KanMX4	pMS2-CP-GFPx3 <CEN pMET25:MS2CPGFPx3 HIS3>
JCY406	bbc1:MS2 sac6:mCherry myo3∆::hph myo3∆::KanMX4	MATa/α ade2-1/ADE2 trp1-1/TRP1 can1-100/CAN1 leu2-3,112/leu2∆0 his3-11,15/his3∆1 ura3/ura3∆0 LYS2/lys2∆0 bbc1:loxP:MS2Lx12/BBC1 myo3∆::KanMX4/myo3∆::hph SAC6/sac6:mCherry:KanMX4	pMS2-CP-GFPx3 <CEN pMET25:MS2CPGFPx3 HIS3>
JCY411	arg3:MS2 myo3∆::KanMX4	MATa ade2-1 trp1-1 can1-100 leu2-3,112 his3-11,15 ura3 GAL+ PSI+ arg3:loxP:MS2Lx12 myo3∆::KanMX4	pMS2-CP-GFPx3 <CEN pMET25:MS2CPGFPx3 HIS3>
JCY420	arg3:MS2 sac6:mCherry myo3∆::hph myo3∆::KanMX4	MATa/α ade2-1/ADE2 trp1-1/TRP1 can1-100/CAN1 leu2-3,112/leu2∆0 his3-11,15/his3∆1 ura3/ura3∆0 LYS2/lys2∆0 arg3:loxP:MS2Lx12/ARG3 myo3∆::KanMX4/myo3∆::hph SAC6/sac6:mCherry:KanMX4	pMS2-CP-GFPx3 <CEN pMET25:MS2CPGFPx3 HIS3>
