# Supplementary material for: Widespread mRNA Association with Cytoskeletal Motor Proteins and Identification and Dynamics of Myosin-Associated mRNAs in S. cerevisiae
Source: PLoS One. 2012 Feb 16;7(2):e31912. doi: 10.1371/journal.pone.0031912 (PMC3281097; doi:10.1371/journal.pone.0031912)
Supplement: Table S6 — BBC1 confinement size statistical tests. K-S and M-W statistics at the 90%, 95%, and 98% confidence thresholds are displayed as in Table S3. (XLS) [file pone.0031912.s014.xls]

## Sheet: Sheet1
Confinement Size
	90% confidence threshold						95% confidence threshold						98% confidence threshold
	BBC1 untreated		BBC1 myo3∆		BBC1 + latB		BBC1 untreated		BBC1 myo3∆		BBC1 + latB		BBC1 untreated		BBC1 myo3∆		BBC1 + latB
	K-S test	M-W test	K-S test	M-W test	K-S test	M-W test	K-S test	M-W test	K-S test	M-W test	K-S test	M-W test	K-S test	M-W test	K-S test	M-W test	K-S test	M-W test
BBC1 untreated
BBC1 myo3∆	0.138	0.0719					0.865	0.8729					0.727	6599
BBC1 + latB	0.004	0.0056	0.24	0.2113			0.001	0.0014	0.001	0.0005			0.358	0.0784	0.135	0.0588
simulation	0	<.0001	0	<.0001	0	<.0001	0	<.0001	0	<.0001	0.001	0.0019	0	<.0001	0	<.0001	0	<.0001
